# Supplementary material
Source: publisher site journal article supplement (https://www.dovepress.com/get_supplementary_file.php?f=354736.docx)
Supplement: Supplementary file 1 [file get_supplementary_file.php]

**Supplementary materials**

**Supplementary Table S1.** Preferred Reporting Items for Systematic reviews and Meta-Analyses extension for Scoping Reviews (PRISMA-ScR) Checklist.

| **SECTION** | **ITEM** | **PRISMA-ScR CHECKLIST ITEM** | **REPORTED ON PAGE #** |
| --- | --- | --- | --- |
| **TITLE** | | | |
| Title | 1 | Identify the report as a scoping review. | 1 |
| **ABSTRACT** | | | |
| Structured summary | 2 | Provide a structured summary that includes (as applicable): background, objectives, eligibility criteria, sources of evidence, charting methods, results, and conclusions that relate to the review questions and objectives. | 2 |
| **INTRODUCTION** | | | |
| Rationale | 3 | Describe the rationale for the review in the context of what is already known. Explain why the review questions/objectives lend themselves to a scoping review approach. | 5 |
| Objectives | 4 | Provide an explicit statement of the questions and objectives being addressed with reference to their key elements (e.g., population or participants, concepts, and context) or other relevant key elements used to conceptualize the review questions and/or objectives. | 5 |
| **METHODS** | | | |
| Protocol and registration | 5 | Indicate whether a review protocol exists; state if and where it can be accessed (e.g., a Web address); and if available, provide registration information, including the registration number. | 6 |
| Eligibility criteria | 6 | Specify characteristics of the sources of evidence used as eligibility criteria (e.g., years considered, language, and publication status), and provide a rationale. | 6 |
| Information sources* | 7 | Describe all information sources in the search (e.g., databases with dates of coverage and contact with authors to identify additional sources), as well as the date the most recent search was executed. | 6 |
| Search | 8 | Present the full electronic search strategy for at least 1 database, including any limits used, such that it could be repeated. | 6 |
| Selection of sources of evidence† | 9 | State the process for selecting sources of evidence (i.e., screening and eligibility) included in the scoping review. | 7 |
| Data charting process‡ | 10 | Describe the methods of charting data from the included sources of evidence (e.g., calibrated forms or forms that have been tested by the team before their use, and whether data charting was done independently or in duplicate) and any processes for obtaining and confirming data from investigators. | 7 |
| Data items | 11 | List and define all variables for which data were sought and any assumptions and simplifications made. | 7 |
| Critical appraisal of individual sources of evidence§ | 12 | If done, provide a rationale for conducting a critical appraisal of included sources of evidence; describe the methods used and how this information was used in any data synthesis (if appropriate). | N/A |
| Synthesis of results | 13 | Describe the methods of handling and summarizing the data that were charted. | Tables 2, 3;  Supplemental Table 2 |
| **RESULTS** | | | |
| Selection of sources of evidence | 14 | Give numbers of sources of evidence screened, assessed for eligibility, and included in the review, with reasons for exclusions at each stage, ideally using a flow diagram. | Figure 1 |
| Characteristics of sources of evidence | 15 | For each source of evidence, present characteristics for which data were charted and provide the citations. | Table 2 |
| Critical appraisal within sources of evidence | 16 | If done, present data on critical appraisal of included sources of evidence (see item 12). | N/A |
| Results of individual sources of evidence | 17 | For each included source of evidence, present the relevant data that were charted that relate to the review questions and objectives. | Pages 8-16 |
| Synthesis of results | 18 | Summarize and/or present the charting results as they relate to the review questions and objectives. | Pages 8-16 |
| **DISCUSSION** | | | |
| Summary of evidence | 19 | Summarize the main results (including an overview of concepts, themes, and types of evidence available), link to the review questions and objectives, and consider the relevance to key groups. | Pages 17-20 |
| Limitations | 20 | Discuss the limitations of the scoping review process. | 19 |
| Conclusions | 21 | Provide a general interpretation of the results with respect to the review questions and objectives, as well as potential implications and/or next steps. | 21 |
| **FUNDING** | | | |
| Funding | 22 | Describe sources of funding for the included sources of evidence, as well as sources of funding for the scoping review. Describe the role of the funders of the scoping review. | We describe the role of funders for our scoping review (page 21). We did not include sources of funding for included sources of evidence. |

**Notes:** JBI = Joanna Briggs Institute; PRISMA-ScR = Preferred Reporting Items for Systematic reviews and Meta-Analyses extension for Scoping Reviews.

* Where *sources of evidence* (see second footnote) are compiled from, such as bibliographic databases, social media platforms, and Web sites.

† A more inclusive/heterogeneous term used to account for the different types of evidence or data sources (e.g., quantitative and/or qualitative research, expert opinion, and policy documents) that may be eligible in a scoping review as opposed to only studies. This is not to be confused with *information sources* (see first footnote).

‡ The frameworks by Arksey and O’Malley (6) and Levac and colleagues (7) and the JBI guidance (4, 5) refer to the process of data extraction in a scoping review as data charting*.*

§The process of systematically examining research evidence to assess its validity, results, and relevance before using it to inform a decision. This term is used for items 12 and 19 instead of "risk of bias" (which is more applicable to systematic reviews of interventions) to include and acknowledge the various sources of evidence that may be used in a scoping review (e.g., quantitative and/or qualitative research, expert opinion, and policy document).

Adapted from: Tricco AC, Lillie E, Zarin W, O'Brien KK, Colquhoun H, Levac D, et al. PRISMA Extension for Scoping Reviews (PRISMA ScR): Checklist and Explanation. *Ann Intern Med*. 2018;169:467–473. [doi:10.7326/M18-0850](http://annals.org/aim/fullarticle/2700389/prisma-extension-scoping-reviews-prisma-scr-checklist-explanation). Copyright © 2018, The American College of Physicians.

**Supplementary Table S2.** Summary of major findings (significant and non-significant associations) demonstrating the relationship between nutrient deficiencies and SSc clinical features, with study references.

| Nutrient | Vitamin D | Vitamin B12 | Vitamin B9 | Homocysteine | Other vitamins | Minerals: Fe, Se, Zn, Cu |
| --- | --- | --- | --- | --- | --- | --- |
| SSc Subtype | - A majority of studies reported no statistically significant difference in vitamin D levels between limited and diffuse SSc.24,26,30,31,33,38–42,45,47 - Two studies reported vitamin D levels as being significantly lower in diffuse-type SSc compared to limited-type.34,36 | Vitamin B12 deficiency does not appear to be associated with SSc subtype or disease duration.52,53 | Did not differ between SSc subtypes53,61,71 | No significant difference in plasma Hcy between diffuse and limited subtypes.61,63,64 | No significant differences between SSc subtypes were found in nutrition status of vitamin C, A, and E.71 | - No significant difference in serum Se, Cu or Zn was found between diffuse and limited subtypes.77 - No significant difference in SSc subtype was found for Se and Zn deficiencies.53 - Lower Cu concentration was associated with diffuse-type in one study.71 - No significant difference found in disease duration or subtype between patients with Se deficiency vs no deficiency.57 |
| Disease Duration | - Many studies reported no significant correlation between vitamin D status and disease duration.24,28,31,36,40,42 | - Vitamin B12 deficiency and disease duration do not appear to be associated52 | Low vit B9 was not associated with disease duration >3 years.53 | Elevated Hcy concentration has been correlated with longer disease duration,63 although one study found no significant association.61 | No significant association was found between vit C deficiency and disease duration.57 | SSc patients with disease duration of >3 years showed higher frequency of Zn deficiency.53 |
| Disease severity | - May be associated with disease severity on the basis of increased organ involvement26,34,39,45 - When disease severity is defined based on validated scales (i.e., Medsger’s DSS), the majority of studies found no significant association30,39,44 |  |  |  | Vit C deficiency associated with more severe disease, as assessed by the summed Medsger’s DSS.57 | - When severity was defined based on extent of organ involvement, SSc patients with skin involvement had lower Se levels compared to those without it.77 - SSc patients with PH had decreased serum Se and Zn compared to healthy controls.77 |
| Cutaneous Sclerosis (skin thickness) | - Five studies found association between reduced vitamin D and greater extent of skin fibrosis as evaluated by the modified Rodnan skin score (mRSS).36,40,42,44,47 - Another five studies found no association between vit D levels and skin fibrosis measured via mRSS.26,33,34,38,39 |  |  | Increased plasma Hcy significantly associated with higher mRSS.64 | Vit C deficiency significantly associated with higher mRSS57 | Lower Se77 and lower Cu78 both significantly associated with higher mRSS and higher total skin score (TSS), respectively |
| Digital ulcers (DUs) and/or calcinosis | - Correlated with occurrence of DUs, but not with arterial stiffness and atherosclerosis.43 - Increased risk of developing DUs within a 5-year follow-up; SSc patients with incident DUs had reduced vitamin D levels compared to patients without them.47 - DU incidence does not correlate with serum vitamin D concentration, but does correlate with microangiopathy patterns.24 - No significant correlation between serum vit D and presence and/or previous history of DUs26,33,39,40,42 or cutaneous ulcers.38 - No significant correlations found between reduced serum vit D and calcinosis.30,44 |  |  | Complications of DU more prevalent in SSc patients with higher plasma Hcy compared to patients with normal levels64 |  | Digital infarcts not found to be associated with iron, Se, Cu, or Zn.78 |
| Raynaud’s | - No significant difference between vit D levels and first symptoms, including limitation of mouth opening, Raynaud phenomenon, and joint involvement.35 - Reduced vitamin D is associated with more diffuse-devascularization and avascular areas measured by nailfold capillaroscopy, but no lung involvement.25 |  |  | - Associated with endothelial damage and microvascular involvement.65 - No significant correlation found between serum Hcy level and Raynaud phenomenon.51,64 - Hcy concentration correlated with NVC pattern, with progressively increasing Hcy from early to late pattern.66 |  |  |
| ILD | - Associated with the presence of ILD.26,30 - Trombetta et al.24 found significant correlation between reduced vitamin D and presence of bilateral bi-basal fibrotic changes in lung CT, but not with presence of ILD at lung CT. - No association between vit D deficiency and ILD.33,43 | Not significantly correlated with lung involvement51 | Not significantly correlated with lung involvement51 | - Progressive increase in Hcy concentration in patients with increasing severity of lung involvement61 - Associations between serum Hcy and lung involvement severity suggest that Hcy may play a role in the pathophysiology of pulmonary involvement in SSc.65 - Significantly higher prevalence of ILD64 in SSc patients with elevated Hcy - No correlation between Hcy and interstitial lung involvement.62 - No significant association between Hcy and presence of lung involvement.51 |  | ILD not found to be associated with iron, Se, Cu, or Zn.78 |
| PH | - Vitamin D deficiency was also not found to be significantly correlated with incident pulmonary arterial hypertension (PAH). 39,47 - While some studies reported an association between lower vitamin D levels and higher sPAP,26,27,30,44 others found no association.24,34 - SSc patients with vit D deficiency had significantly reduced DLCO compared to those with insufficiency.26,27,40 - No significant associations found between vit D levels and delta of forced vital capacity or DLCO.47 - No significant differences found in vit D levels and ILD at CT, total lung capacity, forced vital capacity, and forced expiratory volume in the first second.24 | Not significantly correlated with lung involvement51 | Not significantly correlated with lung involvement51 | Significantly higher prevalence of ILD64 and PH63 in SSc patients with elevated Hcy | Vitamin C and Vit B6 deficiencies associated with presence of PH57 | - SSc patients with PH had relatively lower Zn concentrations than healthy controls, although total serum Cu concentration was not significantly different between SSc-PAH and healthy controls.78 - Se deficiency associated with presence of PH.77 - Iron deficiency was significantly more prevalent in SSc patients with PH compared to those without it, and correlated with poorer survival.80 |
| Cardiac function (LVEF, output, etc.) | - Associated with greater prevalence of systolic dysfunction39 - No significant associations found between vitamin D and enlarged hearth size at chest X-ray and conduction disorders.24 - While one study reported increased heart involvement (no clear definition) in association with low vitamin D,27 another study found no significant associations between vitamin D and cardiac involvement (not clearly defined).40 |  |  |  |  | Cardiac involvement, which included measures of LVEF, sPAP, and cardiac MRI when available, significantly associated with Se deficiency57 |
| Cardiac atherosclerotic presentations | No significant associations found between vitamin D and carotid intima-media thickness (marker of atherosclerosis) and brachial-ankle pulse wave velocity (marker of arterial stiffness).43 |  |  | - Greater plasma Hcy concentration was found in patients with macroangiopathic and thromboembolic events, compared to patients without these presentations.63 - plasma Hcy was not found to be associated with carotid artery atherosclerosis in SSc and did not correlate with plaque score or intima-media thickness.64 |  |  |
| GIT | - Lower serum vitamin D concentrations correlated with higher GIT and kidney parameters of the Medsger’s DSS.24 - No correlations found between vit D levels and GI involvement (undefined),38,40 GI ulcers,34 or gastroesophageal reflux disease.33 - Not found to be associated with other markers of impaired absorption, including hemoglobin, ferritinemia, albuminemia, vitamin B12, or Vit B9s.30 | - No significant differences found for Malnutrition Universal Screening Tool (MUST) scores, mean Hb levels, H. pylori IgG positivity, or GI organ involvements between patients with vitamin B12 deficiency versus patients without.52 - Not significantly correlated with presence of GI involvement51 |  | - No significant association with presence of GIT involvement.51 - Serum levels of cholesterol and triglycerides did not differ significantly between SSc patients with increased versus normal plasma Hcy levels.64 | Vitamin C deficiency was significantly associated with the presence of esophagitis, Barrett’s mucosa, and malnutrition.57 | - Not associated with GI manifestations in SSc patients with very early SSc or established SSc53 - Early SSc patients with lower Zn levels had mild gastrointestinal involvement as assessed by the UCLA SCTC-GIT 2.0.53 |
| Musculoskeletal | - Significant association between reduced BMD and reduced vitamin D levels in SSc.24,25,27,31,45 - Muscle weakness and atrophy associated with vitamin D deficiency.39 - No significant correlation found between reduced vitamin D levels and presence of acro-osteolysis (AO).28,30,38,39 - No significance was found between lower vitamin D and presence of synovitis.39 - Zhang et al.35 found no differences in first symptoms, including the presence of joint involvement (not explicitly defined) between patients with insufficient and normal vitamin D levels - Yacoub et al.45 found that reduced vitamin D levels correlated with severe joint involvement (defined as number of swollen joints, severity of pain, morning stiffness, and/or erosive arthropathy). |  |  | Greater prevalence of AO found in SSc patients with elevated plasma Hcy, compared to patients without it.64 |  |  |
| Miscellaneous | - Associated with development of renal crisis,39 but was not found to be significantly associated with renal involvement (undefined) in another study.33 - Hypovitaminosis D has been associated with autoimmune thyroiditis.31 - One study assessing quality of life (QoL) found decreased serum vitamin D levels associated with lower QoL in patients with diffuse-type SSc.25 | Levels not different between patients with and without anemia.52,53 | Low Vit B9 significantly correlated with presence of anemia.53 |  |  |  |

**Abbreviations:** CT = computed tomography; Cu = copper; DLCO = diffusing capacity for carbon monoxide; Fe = iron; Hcy = homocysteine; Se = selenium; vit = vitamin; Zn = zinc
